# Supplementary material for: Transcriptional characterization and response to defense elicitors of mevalonate pathway genes in cotton (Gossypium arboreum L.)
Source: PeerJ. 2019 Nov 20;7:e8123. doi: 10.7717/peerj.8123 (PMC6874856; doi:10.7717/peerj.8123)
Supplement: Table S1 [file peerj-07-8123-s002.xlsx]

## Sheet: Sheet1
Table S1. Primers for reverse transcription PCR.
Gene	Forward primer(5'-3')	Reverse primer(5'-3')	Annealing temperature (Tm)	Amplicon size
GaAACT1	ATGGCTCCTCCAGATTCTATGAT	TCATAACGATGATCGTAGCACTT	58°C	1248bp
GaAACT2	ATGGCTCCAGTAGCAGCAAC	TTACAGAAGCTCTACAACGAGT	58°C	1224bp
GaHMGS1	ATGGCTAAGAATGTGGGAATTCTTG	CTAATGACCGTTGGCAATGGAAC	58°C	1398bp
GaHMGS2	ATGGCAAAGAATGTGGGAGTTCTAG	TCAATGTCCGTTAGCAAGGGATC	58°C	1398bp
GaHMGS3	ATGGCTAAGAATGTGGGAATTATTG	TCAGTGACCATTGACAACAGAAC	56°C	1398bp
GaHMGR1	ATGGACATTCGACGGCGAC	TTATGATCCAACTTTGGATACATCCT	58°C	1679bp
GaHMGR2	TCATTTCTGTTCCTCTCGGGCTT	CCCCACTTTTATCCCAAATATCAGG	58°C	1824bp
GaHMGR3	ATATCTCAAACTGCACCTTCCC	TCCATTCTTCTCAACCGCCAT	58°C	2038bp
GaHMGR4	CCCCATCATCGTAAAACTAACTGA	TCTCTATGAAGAAGCCTTGGACAC	58°C	1859bp
GaHMGR5	ATGGAGGCTTCCCGGCTGTATT	CTATGAAGAACCCTTGGACACAT	58°C	1758bp
GaHMGR6	ATGGAGACCCACCGGCGATCTT	TTAGGAAGAAACCTTGGAAACATCCTT	58°C	1758bp
GaHMGR7	TTTCTAACTCTCGCCGCTCCC	CTGCCTTGTGCTATCTTGAAAGTCC	58°C	1851bp
GaHMGR8	TCACTTCCTTCAACTCCCGCTTC	ATGGGGGATTTTCAACTTCTACACT	58°C	2005bp
GaHMGR9	CTCTTTCTTCTCTGCCGTCGTC	ACATAGCATGGGATTTGCAACA	58°C	1999bp
GaMK1	ATGGAGGTAACTGCCAGAG	TTAGGAAGAATGATCAAAGGAAATT	55°C	1158bp
GaPMK	ATGGAAGTCGTTGCTTCTGCTC	TCACTTGATGTTGACTGAAGAA	56°C	1530bp
GaMVD	ATGGGGGAGAAATGGGTGTTGA	TTACTTGGGAAGTCCAGTTTCT	56°C	1248bp
