# Supplementary material for: Transcriptional characterization and response to defense elicitors of mevalonate pathway genes in cotton (Gossypium arboreum L.)
Source: PeerJ. 2019 Nov 20;7:e8123. doi: 10.7717/peerj.8123 (PMC6874856; doi:10.7717/peerj.8123)
Supplement: Table S2 [file peerj-07-8123-s003.xlsx]

## Sheet: Sheet1
Table S2. Primers for quantitative real-time PCR.
Gene	Forward primer(5'-3')	Reverse primer(5'-3')	Annealing temperature (Tm)	Amplicon size
GaAACT1	GGAGCTGTATCTTTAGGACATCCAC	AACAACAAGGGCAGATGCTCCA	58°C	144bp
GaAACT2	TTGTGGCTCTTGCAAATCAGA	CAAACACCACCAACTCCGTA	56°C	172bp
GaHMGS1	CCTTATAACAAGCTCGTGCAGA	TTCTCAAGATCCCGGTTTTGGT	56°C	155bp
GaHMGS2	AAAGCGGGTAATATTGTTCTCGTA	ATGCTCCATTAGCTTCATTGTCT	58°C	190bp
GaHMGS3	GCGTGAGCAAAGGAAAATACACCA	TCTATCACGGTCTCGCTGCCAA	58°C	175bp
GaHMGR1	CGACAAGAAACCTGCCGCTA	GGCATTAAATCCACCGAGAGCAC	58°C	194bp
GaHMGR2	GGCTCACCGGCTATCTTCTACT	GAGAGAATGGCGATGATCTCTG	58°C	243bp
GaHMGR3	CTTTTCCGACATCATAGCCCTT	CTCGGCAACCCAAACGTCA	58°C	124bp
GaHMGR4	CCTTTTCCGACATCATCGCCAT	TCGTCCTCAGCAATCCAAACGTC	58°C	130bp
GaHMGR5	GAATGCGGTGTTCTTTACCCTC	GATTGAACGAAGTCAAGCCCAA	56°C	183bp
GaHMGR6	AATTCCGTTCGATCTCACAAGC	ATCGGATCTTTTCCCGCCAA	58°C	169bp
GaHMGR7	CCGGCGATCATCGACTAAACC	ATCTTTTCACGCCAATGGGAA	58°C	180bp
GaHMGR8	GGCTAAACCCGTTCAAGCTC	TCAATCCCGAAGAACCCCAA	56°C	276bp
GaHMGR9	AAACCCGTTATTGTTCTCAAGCC	GTGAAGAACACCGCATTCGT	58°C	116bp
GaMK1	AGATAATTCACGGAAGACCCTC	TCCTTGCCGAAACATTAGCAAC	58°C	180bp
GaPMK	CCAAAGAACACTGGGATGCCTA	TGCTGCCTCTCCCATTGTTCG	58°C	179bp
GaMVD	AAGAAGCCATACAAAACCGTGA	CCCAGCGTCAAATGTATATGCC	58°C	200bp
