# Supplementary material for: Transcriptional characterization and response to defense elicitors of mevalonate pathway genes in cotton (Gossypium arboreum L.)
Source: PeerJ. 2019 Nov 20;7:e8123. doi: 10.7717/peerj.8123 (PMC6874856; doi:10.7717/peerj.8123)
Supplement: Table S3 [file peerj-07-8123-s004.xlsx]

## Sheet: Sheet1
Table S3. Information about the MVA pathway genes from G. arboreum.
Gene name	Gene locus	Chromosome	Location	Strand		Protein length	Mw(kDa)	pI
GaAACT1	evm.model.Ga06G2327	Chr6	129503906-129507912	−	433		44.49	7.52
GaAACT2 a	evm.model.Ga11G2464	Chr11	105802771-105805666	+	413		42.89	8.54
GaHMGS1	evm.model.Ga01G2629	Chr1	110496438-110499725	+	465		51.34	6.47
GaHMGS2	evm.model.Ga08G2094	Chr8	118882851-118886489	−	465		51.65	6.28
GaHMGS3	evm.model.Ga12G0545	Chr12	4709389-4713086	+	465		51.45	6.33
GaHMGR1 a,b	evm.model.Ga01G1297	Chr1	30594047-30595956	−	_		_	_
GaHMGR2	evm.model.Ga03G2244	Chr3	130440895-130442926	−	582		62.32	6.24
GaHMGR3	evm.model.Ga03G2243	Chr3	130400540-130402585	−	585		62.65	6
GaHMGR4	evm.model.Ga03G2242	Chr3	130350902-130352941	−	585		62.65	6
GaHMGR5	evm.model.Ga03G2241	Chr3	130329954-130331978	−	585		62.73	6.44
GaHMGR6	evm.model.Ga01G0160	Chr1	1103133-1106295	+	585		62.82	6.25
GaHMGR7	evm.model.Ga12G2797	Chr12	101435325-101437368	+	585		62.66	6.24
GaHMGR8	evm.model.Ga04G0372	Chr4	4517450-4519607	+	582		62.3	7.03
GaHMGR9	evm.model.Ga13G0657	Chr13	9718725-9721682	+	628		67.55	6.26
GaMK1	evm.model.Ga11G0441	Chr11	5913770-5917159	+	385		40.96	5.64
GaMK2 b	evm.model.Ga11G0904	Chr11	15153969-15155830	−	_		_	_
GaPMK	evm.model.Ga12G0747	Chr12	7019392-7024684	+	509		55.24	6.06
GaMVD a	evm.model.Ga13G0115	Chr13	1265231-1270015	−	415		46	6.22
a The coding sequences of genes are re-annotated. b The gene is identified as a pseudogene.
