# Supplementary material for: Transcriptional characterization and response to defense elicitors of mevalonate pathway genes in cotton (Gossypium arboreum L.)
Source: PeerJ. 2019 Nov 20;7:e8123. doi: 10.7717/peerj.8123 (PMC6874856; doi:10.7717/peerj.8123)
Supplement: Table S4 [file peerj-07-8123-s005.xlsx]

## Sheet: Sheet1
Table S4. The coding sequences of the MVA pathyway genes in G. arboreum
>GaAACT1
ATGGCTCCTCCAGATTCTATGATCAAACCAAAAGATGTTTGTATTGTTGGCGTTGCACGTACACCAATGGGTGGTTTCCTTGGTTCCCTTTCCTCTTCCTCTGCTACCCATCTTGGATCTTTAGCCATTAAAGCTGCCCTTCAAAGGGCAAACCTTGATCCATCACTTGTGCAAGAGGTGTTCTTTGGGAATGTTCTTAGTGCAAATTTAGGTCAAGCTCCTGCTAGGCAGGCTGCATTAGGTGCTGGTATCCCCAATTCTGTCATTTGTACCACTGTTAATAAAGTTTGTTCATCTGGAATGAAAGCGGTGATGCTTGCATCGCAAACTATCGAGTTAGGTATCAATGATGTTGTGGTTGCTGGTGGTATGGAAAGCATGTCAAATGCACCCAAGTAT…
>GaAACT2
ATGGCTCCAGTAGCAGCAACATCTTCAGATTCTATAAAGCCTAGAGATGTTTGTGTTGTTGGTGTTGCACGTACTCCAATGGGTGGATTTCTTGGCTCTCTGTCATCTTTATCTGCCACCAAGCTTGGTTCGATAGCCATAGAAGCTGCTCTTAAAAGGGCAAATGTTGATCCATCACTTGTGCAAGAAGTTTTCTTTGGCAATGTACTCAGCGCGAATTTGGGACAGGCTCCAGCTAGACAGGCTGCGCTAGGTGCAGGAATTCCTAACTCGGTCATATGCACCACTGTTAACAAAGTTTGTGCATCTGGGATGAAAGCAACAATGCTTGCCGCACAGAGTATTCAGTTGGGCATTAATGATGTTGTTGTGGCTGGTGGCATGGAGAGCATGTCTAAT…
>GaHMGS1
ATGGCTAAGAATGTGGGAATTCTTGCTATGGAAATCTACTTCCCTCCTACCTGTGTTCAACAGGAAGCATTGGAGGCTCATGATGGTGCTAGTAAGGGGAAATACACCATTGGACTTGGACAAGATTGCATGGCCTTTTGTACAGAAGTGGAAGATGTTATCTCTATGAGTTTAACAGCTGTTACTTCACTCCTTGCAAAATATAAGATTGACCCCAAACAAATCGGCCGTCTTGAAGTTGGTAGTGAGACTGTGATCGACAAGAGCAAGTCCATTAAGACCTTCTTGATGCAAATCTTTGAGAAATCTGGAAACACTGACATCGAAGGGGTTGACTCAACTAATGCATGCTATGGAGGGACTGCAGCTCTATTTAACTGTGTCAATTGGGTTGAAAGT…
>GaHMGS2
ATGGCAAAGAATGTGGGAGTTCTAGCTATGGAAATCTACTTCCCTCCTACCTGTGTTCAACAGGAAGCATTGGAGACTCATGATGGTGCAAGCAAAGGAAAATACACCATTGGACTTGGACAAGATTGCATGGCCTTTTGTACCGAGGTCGAAGATGTTATCTCAATGGGTTTGACTGCTGTTACTTCACTCCTTGAAAAGTATACGATTGACCCTAAGCAAATTGGCCGTTTCGAAGTTGGGAGTGAGACTGTTATAGACAAGAGCAAGTCCATTAAGACTTTCCTAATGCAAATCTTTGAGAAATGTGGTAACACTGACATTGAAGGGGTGGACTCAACGAATGCTTGTTATGGAGGGACTGCAGCTCTATTCAACTGCGTCAATTGGGTGGAAAGT…
>GaHMGS3
ATGGCTAAGAATGTGGGAATTATTGCTATGGATATTTACTTCCCTCCTACCTTTGTTCAACAGGAAGCCTTGGAGGCTCATGATGGCGTGAGCAAAGGAAAATACACCATTGGACTTGGACAAGATTGTTTGGCCTTCTGTACTGAGGTCGAAGATGTTATCTCAATGAGTTTGACAGTTGTTACTTCACTCCTTGAGAAGTATAAGATTGACCCTAAACAAATTGGCCGTCTTGAAGTTGGCAGCGAGACCGTGATAGACAAGAGCAAGTCCATTAAGACTTTCCTAATGCAAATTTTTGAGAAATGTGGAAACACTGACATTGAAGGGGTCGACTCAACTAATGCATGTTATGGAGGGACTGCAGCTCTGTTCAACTGTGTCAATTGGGTGGAAAGT…
>GaHMGR2
ATGGAGGCTCACCGGCTATCTTCTACTAAACCTGTTCAAGCTCTCAAGCCAACAAAGAAGATTCCTTTAGAGGAAGATACCGGTAAAGCCTCCGACGCACTGCCGCTTCCCTTGTACCTAACGAATGCCCTGTTCTTCACCCTCTTCTTCTCGGTGGTTTATTTCCTTCTTTCCCGTTGGCGTGAGAAGATCCGTACCTCCACACCTCTCCATGTCGTCACCTTTTCAGAGATCATCGCCATTCTCTCATTTTTCGCGTCCTTTATTTACCTTTTGGGTTTCTTTGGGATTGACTTCGTTCAATCTTTGGTTTTCCAACCATCGCCTGACGTTTGGATTGCCGAGGAAGAGGATGATGAAGTTCTGCTTGCAAAGGAAGATGCCCGTAAGGTCCCTTGC…
>GaHMGR3
ATGGAGGCTCCCCGGCTGTATTCGACTAAACCTGTTCAATCTCTCAAGCCAACGAAGAAGATTCCTTTAGAGGAAGATCACGGTAAAGCCTCAGACGCATTGCCGCTTCCCTTGCACCTAACGAATGCCCTGTTCTTCTCCCTCTTCTTCTCGGTGGTTTATTTCCTTCTTTCCCGTTGGCGTGAGAAGATCCGTACCTCCACAGCTCTCCATGTCGTCACCTTTTCCGACATCATAGCCCTTCTCTCATTTTTCGCGTCCTTTATTTACCTTTTGGGTTTCTTTGGGATTGACTTCGTTCAATCCTTGGTTTTCCAACCATCGCCTGACGTTTGGGTTGCCGAGGACGAGGAAGACGATAATGAAGTTCTGCTCGCAAAGGAAGACACCCGTAAGGTC…
>GaHMGR4
ATGGAGGCTCCTCGGCTGTATTCGACTAAACCTGTTCAATCTCTCAAGCCAACGAAGAAGATTCCTTTAGAGGAAGATCTCGGTAAAGCCTCCGACGCATTGCCGCTTCCCTTGTACCTAACCAATGCCCTGTTCTTCACCCTTTTCTTCTCGGTGGTTTATTTTCTTCTTTCCCGTTGGCGTGAGAAGATACGTACCTCCACACCTCTCCATGTCGTCACCTTTTCCGACATCATCGCCATTTTCTCATTTTTCGCGTCCTTTAGTTACCTTTTGGGTTTCTTTGGGATTGACTTCGTTCAATCTTTGGTTTTCCAACCATCGCCTGACGTTTGGATTGCTGAGGACGAGGAAGAGGATAATGAAGTTCTGCTCGCTAAGGAAGACGCCCGTAAGGTC…
>GaHMGR5
ATGGAGGCTTCCCGGCTGTATTCGACTAAACGAGTTCAATCTCTCAAGCCCACTAAGAAGATTCCTTTAGAGGAAGATCCCACTAAAGCCTCCGACGCATTGCCGCTTTCTTTGCATCTGACGAATGCGGTGTTCTTTACCCTCTTCTTCTCGGTGGTTTATTTCCTTCTTTCCCGTTGGCGTGAGAAGATCCGTACCTCCACGCCTCTCCATGTCGTCACCTTTTCTGAGATCATCGCGATTCTCGCGTTTTTCGCATCGTTTATTTACCTTTTGGGTTTCTTTGGGCTTGACTTCGTTCAATCTTTGGTTTTCCGGCCATCGCCTGACGTTTGGATTGCCGAAGACGAGGAAGAGGAAAATGAAGTTTTGCTTGCAAAAGAGGATGCCCGTAAGGTC…
>GaHMGR6
ATGGAGACCCACCGGCGATCTTCGACTAATTCCGTTCGATCTCACAAGCCGGCAAGGCCAATTGCTTTGGAAGATGATTCCACCAAAGCTTCTGACGCATTGCCACTTCCTTTGTATTTAACGAATGCTGTGTTCTTCACTCTCTTTTTCTCGGCGGTTTATTTCCTTCTTTGCCGTTGGCGGGAAAAGATCCGATCCTCTACGCCTCTCCATGTCGTCACCTTTTCCGAGATCGTTGCGATTCTTGCTTCCGTTGCGTCGTTTATTTACCTTTTGGGGTTCTTTGGTATCGATTTCGTTCAATCTTTGGTTCTCCGGCCATCGGCTGACGTTTGGGCTACTGAAGATGATGAAGTGGAAACTGAAGTTTTGCTTCGTAATGAAGATGCTCGTCACGTT…
>GaHMGR7
ATGGAGGCCCGCCGGCGATCATCGACTAAACCGTTTCAATCTCTGAAGCCAACGAAGACGGTTTCAGTAGACGAAGATCTCACCAAAGCCTCCGATGCATTACCGCTTCCTTTGCATCTATCCAATGCTGTCTTCTTCACCCTCTTCTTCTCTGCAGTTTATTTCCTTCTTTCCCATTGGCGTGAAAAGATCCGGACCTCCACGCCTCTCAGCGTCGTTACCTATTCTGAGATCATCGCCATTCTCGCCTTCGTCGCTTCCTTTATTTACCTTCTGGGATTCTTCGGGATTGACTTTGTTCAGTCTCTGATTCTCCGACCGCAGACTGAAGTTTGGAACTCTGAGGACGATGATGAGGTAGCTGATGTTTTGCTTCGTAAAGAAGATGCCCGTAAAGTC…
>GaHMGR8
ATGGAGGCCCGCTGGAGATCGTCGGCTAAACCCGTTCAAGCTCCGAAAACAACGAAAACGGTTTCTTTTGAGGAAGTTTCCGGCAAAGCCTCCTCCTCCGAAGCATTGCCTCTCTCTTTACATCTAACGAATGCTGTGTTCTTCTCGCTGTTTTTCTCTGTGGTTTATTTTCTTCTTTCCCGTTGGCGTGAAAAGATCCGTACTTCCACGCCCCTTCACCTCGTCAACCTTTCAGAGATCGTCGCGATTTTCGCTTTTATCGCCTCGTTTGTTTATCTTTTGGGGTTCTTCGGGATTGATTTCGTTCAGTCTTTGATCCTCCGACCGTCGACTGACCTTTGGAATTCCGAGGACGAAGAGGAAAATGAAGCTTTGCTTCGTAAAGAAGATGCTCGTAAA…
>GaHMGR9
ATGGAAGCCAGCCGGCGTTCAGCGGTTAAACCCGTTATTGTTCTCAAGCCAAGTAAGAGGGTCCCTTTAGTGGAAGATACCCCCGGCAAAGCCTCCGACGCGTTGCCTCTTCCTTTGTACCTAACGAATGCGGTGTTCTTCACGCTCTTCTTCACCGTGGTTTATTTTCTTCTATCCCGTTGGCGCGAAAAGATCCGAGCTTCAATCCCTCTCCACGCCGTCACCTTTCCCGAGATCGTCGCGATTTTCGCTTTTGTTGCATCGTTGATTTATCTTTTGGGGTTCTTCGGGATAGACTTTGTACAGTCTTTGATTATCCGGCCATCGGGTGATGTTTGGAGTGGTGAGGACTATGAAGAGGAAAATGAAGTGTTGCTTCATGAGGAAGATGCCCGTACA…
>GaMK1
ATGGAGGTAACTGCCAGAGCTCCAGGGAAGATCATTCTCGCCGGTGAACATGCTGTGGTTCATGGATATACTGCCGTTGCTTCCTCCATTGATCTCTACACTGTTGTCTCTCTTCGTCTTCGTTCTGAAGACGAAGATACAGTAAAACTTAAGCTCAATGACATTGGATTAGACTTTTCATGGTCAGTCGGAAGAATCAAGGAAGTGCTATCTCACTTAGGTTCTCCATTTTCTTCGACACCCACATCATGCTCATTGGAGACCATTAAATCTCTCGCCACTCTTGTTGATGAGCAAAGTTTCCCCGAGACAAAGATTGGACTTGCTTCTGGGGTTTATGCATTTCTTTGGTTGTACACCTCTATATTGGGGTTTAAGCCGGCTACAGTCACCGTTTCT…
>GaPMK
ATGGAAGTCGTTGCTTCTGCTCCGGGAAAGGTTTTGATGACTGGGGGATATTTAATTTTGGAGAGACCAAATGCTGGGATTGTTCTGAGTACAAGTGCACGTTTTTACGCTATTGTTAAGCCAATTCATGAAGCTATCAAGCCTGAAAGCTGGGCATGGTCTTGGACCGATGTCAAGCTAACATCTCCTCAGCTTTCCAGAGAAAGCATGTATAAATTGTCTCGGAAACATTTAACACTTCAGTGTGTATCTTCAAGTGAATCAAGGAACCCTTTTGTAGAAAATGCTGTTCAATATACTATAGCAGCTGCACATGCAACATTTGACAAGAATAAGAAAGAGGCATTAGATAAACTACTCTTACAAGGTCTTGATATTACGATCTTAGGTTGCAATGAC…
>GaMVD
ATGGGGGAGAAATGGGTGTTGATGAAAACGGCTCAGACCCCTACCAACATTGCAGTGATTAAGTATTGGGGGAAGAGGGATGAGACCCTTATTTTGCCCGTTAACGATAGCATCAGCGTTACTCTTGATCCTGCTCATCTCTGCACCACAACCACTGTCGCTGTTAGCCCTGCTTTCCAACAAGATCGTATGTGGCTCAATGGCAAGGAAATGTCCCTTTCCGGAGGAAGGTACCAGAACTGTTTGAGGGAAATCAGAAAACGGGCTAGGGAAGTTGAGGATAAAGAGAGGGGAATAAAGATAGAGAAGAAAGATTGGGAGAAACTGCATCTTCATATTGCATCTTATAACAATTTCCCTACAGCTGCAGGATTGGCTTCCTCTGCTGCTGGTTTTGCT…
