# Supplementary material for: Transcriptional characterization and response to defense elicitors of mevalonate pathway genes in cotton (Gossypium arboreum L.)
Source: PeerJ. 2019 Nov 20;7:e8123. doi: 10.7717/peerj.8123 (PMC6874856; doi:10.7717/peerj.8123)
Supplement: Table S5 [file peerj-07-8123-s006.xlsx]

## Sheet: Sheet1
Table S5. SNP density of the gene body and sequences 5 kb upstream and downstream of each MVA pathway gene in 215 G. arboreum accessions.
Gene	5 kb_upstream			Genebody			5 kb_downstream
	Number of SNPs	Length (bp)	Density of SNPs	Number of SNPs	Length (bp)	Density of SNPs	Number of SNPs	Length (bp)	Density of SNPs
GaAACT1	17	5000	0.0034	25	4006	0.0062	23	5000	0.0046
GaAACT2	2	5000	0.0004	1	2895	0.0003	1	5000	0.0002
GaHMGS1	5	5000	0.001	2	3287	0.0006	20	5000	0.004
GaHMGS2	0	5000	0	0	3638	0	0	5000	0
GaHMGS3	0	5000	0	2	3697	0.0005	1	5000	0.0002
GaHMGR1	0	5000	0	0	1909	0	0	5000	0
GaHMGR2	2	5000	0.0004	0	2031	0	6	5000	0.0012
GaHMGR3	11	5000	0.0022	2	2045	0.001	3	5000	0.0006
GaHMGR4	1	5000	0.0002	0	2039	0	2	5000	0.0004
GaHMGR5	2	5000	0.0004	0	2024	0	4	5000	0.0008
GaHMGR6	1	5000	0.0002	1	3162	0.0003	0	5000	0
GaHMGR7	13	5000	0.0026	5	2043	0.0024	4	5000	0.0008
GaHMGR8	2	5000	0.0004	2	2157	0.0009	5	5000	0.001
GaHMGR9	3	5000	0.0006	1	2957	0.0003	0	5000	0
GaMK1	1	5000	0.0002	7	3389	0.0021	0	5000	0
GaPMK	1	5000	0.0002	1	5292	0.0002	15	5000	0.003
GaMVD	23	5000	0.0046	22	4784	0.0046	27	5000	0.0054
