# Supplementary material for: Transcriptional characterization and response to defense elicitors of mevalonate pathway genes in cotton (Gossypium arboreum L.)
Source: PeerJ. 2019 Nov 20;7:e8123. doi: 10.7717/peerj.8123 (PMC6874856; doi:10.7717/peerj.8123)
Supplement: Table S6 [file peerj-07-8123-s007.xlsx]

## Sheet: Sheet1
Table S6. Number of SNPs in exons and introns of each MVA pathway gene.
Gene	Number of SNPs
	Exon	Intron	Total
GaAACT1	4	21	25
GaAACT2	0	1	1
GaHMGS1	0	2	2
GaHMGS2	0	0	0
GaHMGS3	1	1	2
GaHMGR1	0	0	0
GaHMGR2	0	0	0
GaHMGR3	2	0	2
GaHMGR4	0	0	0
GaHMGR5	0	0	0
GaHMGR6	0	1	1
GaHMGR7	5	0	5
GaHMGR8	2	0	2
GaHMGR9	1	0	1
GaMK1	1	6	7
GaPMK	0	1	1
GaMVD	3	19	22
