# Supplementary material for: Transcriptional characterization and response to defense elicitors of mevalonate pathway genes in cotton (Gossypium arboreum L.)
Source: PeerJ. 2019 Nov 20;7:e8123. doi: 10.7717/peerj.8123 (PMC6874856; doi:10.7717/peerj.8123)
Supplement: Table S7 — Relative expression levels in roots, stems, cotyledons, leaves, and ovules at 0, 10, 20, 30, and 40 DPA were calculated by the 2 − Δ Ct method with cotton UBQ7 as an internal control. Results are the mean ± SD of three replicates. Statistical analysis was performed using one-way ANOVA with Tukey’s HSD test. Different letters indicate significant differences (p < 0.05). [file peerj-07-8123-s008.xlsx]

## Sheet: Sheet1
Table S7. Expression profiles of the MVA pathway genes in various G. arboreum tissues tested by qRT-PCR.
	GaAACT1	GaAACT2	GaHMGS1	GaHMGS2	GaHMGS3	GaHMGR1	GaHMGR2	GaHMGR3	GaHMGR4	GaHMGR5	GaHMGR6	GaHMGR7	GaHMGR8	GaHMGR9	GaMK1	GaPMK	GaMVD
Root	0.0408±0.0015d	0.4523±0.0373a	0.1500±0.0121a	0.0284±0.0025c	0.1319±0.0055a	0.0192±0.0012a	0.4478±0.0013a	0.0211±0.0013d	0.0515±0.0016a	0.0331±0.0041b	0.0635±0.0025d	0.0220±0.0003a	0.0155±0.0016b	0.0474±0.0012c	0.0641±0.0009bc	0.1824±0.0236b	0.2819±0.0213a
Stem	0.0322±0.0022d	0.3659±0.0275b	0.1218±0.0041b	0.0495±0.0015b	0.0576±0.0157b	0.0070±0.0008c	0.2276±0.0047c	0.0040±0.0001e	0.0047±0.0003fg	0.0437±0.0006b	0.1027±0.0111c	0.0003±0.0000g	0.0175±0.0014b	0.0317±0.0009d	0.0638±0.0026bc	0.0917±0.0089cd	0.0825±0.0065ef
Cotyledon	0.0779±0.0022c	0.2530±0.0125c	0.1095±0.0118b	0.0516±0.0026b	0.0631±0.0073b	0.0155±0.0036ab	0.1407±0.0042d	0.0042±0.0001e	0.0243±0.0017c	0.1010±0.0129a	0.2024±0.0093a	0.0049±0.0005f	0.0147±0.0015b	0.0963±0.0077a	0.0865±0.0042b	0.2461±0.0133a	0.1500±0.0145c
Leaf	0.0362±0.0022d	0.2598±0.0215c	0.1163±0.0075b	0.1391±0.0075a	0.0558±0.0038b	0.0052±0.0008cd	0.2609±0.0120c	0.0034±0.0011e	0.0104±0.0008e	0.0450±0.0031b	0.1523±0.0123b	0.0065±0.0006de	0.1059±0.0090a	0.0478±0.0019c	0.0494±0.0090bcd	0.1858±0.0170b	0.1128±0.0014d
0 DPA Ovule	0.0250±0.0003d	0.0705±0.0068d	0.0792±0.0017c	0.0365±0.0012c	0.0653±0.0084b	0.0050±0.0008cd	0.0683±0.0049e	0.0044±0.0002e	0.0046±0.0003fg	0.0131±0.0008c	0.1025±0.0120c	0.0119±0.0007c	0.0011±0.0001c	0.0189±0.0028e	0.0847±0.0037b	0.0710±0.0049d	0.0540±0.0093f
10 DPA Ovule	0.0314±0.0025d	0.1390±0.0097d	0.1558±0.0118a	0.1459±0.0029a	0.0164±0.0019c	0.0087±0.0014c	0.0623±0.0034e	0.0037±0.0000e	0.0018±0.0002g	0.0066±0.0005c	0.1305±0.0080b	0.0045±0.0003f	0.0025±0.0002c	0.0178±0.0015e	0.0423±0.0041cd	0.0765±0.0074cd	0.1084±0.0031de
20 DPA Ovule	0.0686±0.0061c	0.3527±0.0114b	0.0705±0.0072c	0.0170±0.0039d	0.0493±0.0057b	0.0022±0.0002d	0.4026±0.0173b	0.0327±0.0012c	0.0309±0.0029b	0.0057±0.0001c	0.0786±0.0040d	0.0058±0.0003ef	0.0022±0.0000c	0.0231±0.0028de	0.2167±0.0350a	0.1095±0.0052c	0.2428±0.0077b
30 DPA Ovule	0.1090±0.0048b	0.5016±0.0587a	0.0740±0.0048c	0.0121±0.0016de	0.0685±0.0067b	0.0046±0.0006cd	0.4319±0.0307ab	0.0464±0.0061b	0.0174±0.0019d	0.0082±0.0004c	0.1393±0.0022b	0.0077±0.0005d	0.0017±0.0001c	0.0317±0.0044d	0.2369±0.0164a	0.0996±0.0093cd	0.0640±0.0076f
40 DPA Ovule	0.2175±0.0228a	0.0742±0.0116d	0.0086±0.0007d	0.0034±0.0002e	0.0044±0.0001c	0.0145±0.0015b	0.2406±0.0195c	0.1015±0.0044a	0.0076±0.0004ef	0.0088±0.0003c	0.0593±0.0056d	0.0174±0.0007b	0.0045±0.0004c	0.0728±0.0016b	0.0118±0.0016d	0.0154±0.0008e	0.0113±0.0019g
Relative expression levels in roots, stems, cotyledons, leaves, and ovules at 0, 10, 20, 30, and 40 DPA were calculated by the 2−ΔCt method with cotton UBQ7 as an internal control. Results are the mean ± SD of three replicates. Statistical analysis was performed using one-way ANOVA with Tukey's HSD test. Different letters indicate significant differences (p < 0.05).
