# Supplementary material for: Transcriptional characterization and response to defense elicitors of mevalonate pathway genes in cotton (Gossypium arboreum L.)
Source: PeerJ. 2019 Nov 20;7:e8123. doi: 10.7717/peerj.8123 (PMC6874856; doi:10.7717/peerj.8123)
Supplement: Table S8 — Relative expression levels were calculated by the 2 − Δ Ct method with cotton UBQ7 as an internal control. Results are the mean ±SD of three replicates. Asterisks indicate significant differences between the treated and mock samples, *P ≤ 0.05, **P ≤ 0.01, Student’s t-test. [file peerj-07-8123-s009.xlsx]

## Sheet: Sheet1
Table S8. Expression levels of the MVA pathway genes in response to MeJA, SA, V. dahliae infection, and H. armigera infestation tested by qRT-PCR.
Gene	MeJA (100 μM)									SA (2 mM)
	0 h	Mock - 1 h	1 h	Mock - 3 h	3 h	Mock - 6 h	6 h	Mock - 12 h	12 h	0 h	Mock - 1 h	1 h	Mock - 3 h	3 h	Mock - 6 h	6 h	Mock - 12 h	12 h
GaAACT1	0.0292±0.0011	0.0378±0.0028	0.0359±0.0059	0.0341±0.0016	0.0600±0.0031**	0.0302±0.0007	0.0759±0.0056**	0.0227±0.0011	0.0403±0.0029**	0.0292±0.0011	0.0378±0.0028	0.0722±0.0012**	0.0341±0.0016	0.0628±0.0103**	0.0302±0.0007	0.0325±0.0031	0.0227±0.0011	0.0263±0.0003**
GaAACT2	0.2442±0.0101	0.3220±0.0231	0.3457±0.0351	0.1870±0.0072	0.3449±0.0085**	0.4982±0.0164	1.7861±0.0454**	0.4392±0.0323	1.7563±0.0224**	0.2442±0.0101	0.3220±0.0231	0.3372±0.0152	0.1870±0.0072	0.2424±0.0152**	0.4982±0.0164	0.3951±0.0230**	0.4392±0.0323	0.2529±0.0144**
GaHMGS1	0.0947±0.0035	0.1231±0.0107	0.2918±0.0175**	0.0885±0.0029	0.1312±0.0092**	0.1338±0.0085	1.0992±0.0842**	0.1446±0.0066	1.0805±0.1072**	0.0947±0.0035	0.1231±0.0107	0.1292±0.0142	0.0885±0.0029	0.0749±0.0105	0.1338±0.0085	0.0851±0.0025**	0.1446±0.0066	0.1048±0.0044**
GaHMGS2	0.0218±0.0007	0.0232±0.0004	0.0141±0.0014**	0.0263±0.0025	0.0259±0.0032	0.0345±0.0011	0.0388±0.0022*	0.0308±0.0035	0.0471±0.0022**	0.0223±0.0004	0.0232±0.0004	0.0261±0.0048	0.0263±0.0025	0.0283±0.0034	0.0345±0.0011	0.0205±0.0006**	0.0308±0.0035	0.0332±0.0046
GaHMGS3	0.0988±0.0038	0.1444±0.0022	0.1890±0.0124**	0.1375±0.0152	0.2283±0.0218**	0.0890±0.0077	0.4376±0.0016**	0.0884±0.0048	0.3330±0.0107**	0.0751±0.0078	0.1444±0.0022	0.0878±0.0100**	0.1375±0.0152	0.1608±0.0108*	0.0890±0.0077	0.0596±0.0009**	0.0884±0.0048	0.1157±0.0079**
GaHMGR1	0.0070±0.0002	0.0085±0.0002	0.0036±0.0003**	0.0067±0.0011	0.0064±0.0007	0.0061±0.0002	0.0135±0.0004**	0.0078±0.0002	0.0108±0.0008**	0.0083±0.0009	0.0085±0.0002	0.0187±0.0029**	0.0067±0.0011	0.0105±0.0008**	0.0061±0.0002	0.0161±0.0009**	0.0078±0.0002	0.0176±0.0010**
GaHMGR2	0.2674±0.0276	0.3066±0.0230	0.2570±0.0263	0.1460±0.0073	0.2671±0.0311**	0.0712±0.0060	2.3416±0.1066**	0.1017±0.0082	0.3967±0.0119**	0.2745±0.0138	0.3066±0.0230	0.3113±0.0233	0.1460±0.0073	0.2735±0.0290**	0.0712±0.0060	0.1926±0.0066**	0.1017±0.0082	0.1397±0.0044**
GaHMGR3	0.0053±0.0001	0.0177±0.0010	0.1340±0.0070**	0.0087±0.0002	0.0261±0.0004**	0.0153±0.0014	1.0388±0.0591**	0.0264±0.0017	0.1149±0.0049**	0.0055±0.0004	0.0177±0.0010	0.0064±0.0011**	0.0087±0.0002	0.0147±0.0015**	0.0153±0.0014	0.0434±0.0017**	0.0264±0.0017	0.0360±0.0028**
GaHMGR4	0.0433±0.0040	0.0889±0.0036	0.3370±0.0136**	0.0386±0.0015	0.0835±0.0066**	0.0179±0.0017	3.6815±0.1734**	0.0344±0.0018	0.2537±0.0100**	0.0456±0.0081	0.0889±0.0036	0.0644±0.0036**	0.0386±0.0015	0.0769±0.0060**	0.0179±0.0017	0.0471±0.0012**	0.0344±0.0018	0.0615±0.0037**
GaHMGR5	0.0154±0.0013	0.0305±0.0014	0.0922±0.0016**	0.0099±0.0010	0.0254±0.0011**	0.0031±0.0002	0.0773±0.0044**	0.0067±0.0003	0.0244±0.0020**	0.0154±0.0013	0.0305±0.0014	0.0334±0.0013	0.0099±0.0010	0.0378±0.0056**	0.0031±0.0002	0.0117±0.0016**	0.0067±0.0003	0.0137±0.0017**
GaHMGR6	0.0702±0.0089	0.0668±0.0028	0.0386±0.0010**	0.0446±0.0066	0.0345±0.0024	0.0166±0.0006	0.0592±0.0056**	0.0381±0.0027	0.0507±0.0015**	0.0702±0.0089	0.0668±0.0028	0.0680±0.0078	0.0446±0.0066	0.0505±0.0019	0.0166±0.0006	0.0495±0.0065**	0.0381±0.0027	0.0395±0.0036
GaHMGR7	0.0183±0.0029	0.0294±0.0019	0.0971±0.0011**	0.0165±0.0018	0.0277±0.0033**	0.0048±0.0002	0.1200±0.0052**	0.0144±0.0010	0.0513±0.0056**	0.0183±0.0029	0.0294±0.0019	0.0172±0.0012**	0.0165±0.0018	0.0201±0.0020	0.0048±0.0002	0.0069±0.0007**	0.0144±0.0010	0.0102±0.0003**
GaHMGR8	0.0014±0.0000	0.0013±0.0001	0.0010±0.0001	0.0036±0.0002	0.0016±0.0001**	0.0005±0.0000	0.0026±0.0002**	0.0005±0.0001	0.0016±0.0001**	0.0014±0.0000	0.0013±0.0001	0.0017±0.0000**	0.0016±0.0001	0.0029±0.0002**	0.0002±0.0000	0.0014±0.0000**	0.0009±0.0001	0.0047±0.0003**
GaHMGR9	0.0287±0.0045	0.0250±0.0018	0.0345±0.0030**	0.0266±0.0039	0.0353±0.0047	0.0447±0.0014	0.1633±0.0148**	0.0782±0.0041	0.0910±0.0055*	0.0287±0.0045	0.0250±0.0018	0.0405±0.0021**	0.0266±0.0039	0.0600±0.0037**	0.0447±0.0014	0.1483±0.0002**	0.0782±0.0041	0.1209±0.0095**
GaMK1	0.0922±0.0106	0.1272±0.0124	0.4437±0.0082**	0.0808±0.0033	0.1913±0.0390**	0.0362±0.0039	0.4662±0.0226**	0.0484±0.0063	0.3253±0.0182**	0.0922±0.0106	0.1272±0.0124	0.0880±0.0053**	0.0808±0.0033	0.0914±0.0079	0.0362±0.0039	0.0400±0.0035	0.0484±0.0063	0.0313±0.0025*
GaPMK	0.1083±0.0072	0.0952±0.0044	0.2398±0.0083**	0.1617±0.0198	0.2543±0.0174**	0.0730±0.0050	0.3430±0.0190**	0.0768±0.0041	0.2883±0.0404**	0.1188±0.0071	0.0952±0.0044	0.1439±0.0052**	0.1617±0.0198	0.1356±0.0143	0.0730±0.0050	0.0851±0.0032*	0.0768±0.0041	0.0471±0.0035**
GaMVD	0.0935±0.0094	0.1024±0.0065	0.2203±0.0074**	0.1782±0.0047	0.1771±0.0029	0.0307±0.0018	0.2329±0.0143**	0.0449±0.0037	0.1374±0.0094**	0.0935±0.0094	0.1024±0.0065	0.1906±0.0130**	0.1782±0.0047	0.2656±0.0288**	0.0307±0.0018	0.0903±0.0037**	0.0449±0.0037	0.0643±0.0057**
Gene	V. dahliae infection									H. armigera infestation
	0 h	Mock - 6 h	6 h	Mock - 12 h	12 h	Mock - 24 h	24 h	Mock - 48 h	48 h	0 h	Mock - 6 h	6 h	Mock - 12 h	12 h	Mock - 18 h	18 h	Mock - 24 h	24 h
GaAACT1	0.0226±0.0021	0.0575±0.0033	0.1024±0.0045**	0.0681±0.0024	0.0595±0.0062	0.0618±0.0042	0.0544±0.0015*	0.0546±0.0031	0.0540±0.0041	0.0147±0.0011	0.0164±0.0015	0.0083±0.0006**	0.0148±0.0015	0.0078±0.0010**	0.0190±0.0033	0.0376±0.0055**	0.0220±0.0023	0.0189±0.0015
GaAACT2	0.5769±0.0558	1.0968±0.0328	1.3422±0.0394**	0.4843±0.0309	0.5065±0.0405	0.2806±0.0119	0.7471±0.0069**	0.3501±0.0160	0.5077±0.0277**	0.1304±0.0062	0.1114±0.0048	0.0795±0.0229	0.0697±0.0070	0.0504±0.0049*	0.2508±0.0493	0.2313±0.0091	0.1952±0.0255	0.2272±0.0256
GaHMGS1	0.1361±0.0137	0.3383±0.0131	0.5661±0.0206**	0.2559±0.0080	0.1993±0.0242*	0.1690±0.0058	0.2238±0.0103**	0.2326±0.0203	0.1845±0.0171*	0.0374±0.0003	0.0670±0.0034	0.0345±0.0033**	0.0293±0.0011	0.0241±0.0018*	0.0583±0.0077	0.0520±0.0050	0.0672±0.0028	0.0887±0.0095*
GaHMGS2	0.0293±0.0009	0.0228±0.0028	0.0909±0.0115**	0.0615±0.0033	0.0425±0.0024**	0.0282±0.0007	0.0329±0.0004**	0.0280±0.0004	0.0322±0.0008**	0.0344±0.0007	0.0631±0.0053	0.0549±0.0051	0.0304±0.0014	0.0312±0.0017	0.0372±0.0036	0.0619±0.0039**	0.0611±0.0037	0.0567±0.0070
GaHMGS3	0.1039±0.0094	0.7611±0.0246	1.3608±0.1305**	0.4353±0.0132	0.2836±0.0321**	0.1943±0.0149	0.3444±0.0214**	0.1522±0.0172	0.2016±0.0208*	0.0165±0.0012	0.0124±0.0008	0.0152±0.0029	0.0118±0.0005	0.0158±0.0021*	0.0298±0.0037	0.0366±0.0026	0.0132±0.0016	0.0184±0.0015*
GaHMGR1	0.0083±0.0003	0.0093±0.0012	0.0306±0.0034**	0.0177±0.0006	0.0141±0.0013*	0.0127±0.0007	0.0091±0.0008**	0.0086±0.0002	0.0111±0.0006**	0.0041±0.0002	0.0058±0.0001	0.0035±0.0003**	0.0034±0.0006	0.0037±0.0005	0.0046±0.0010	0.0075±0.0005**	0.0065±0.0005	0.0044±0.0004**
GaHMGR2	0.1416±0.0056	0.2515±0.0096	0.4771±0.0262**	0.3554±0.0285	0.2463±0.0020**	0.1502±0.0057	0.2206±0.0319*	0.1220±0.0122	0.2531±0.0082**	0.1923±0.0249	0.1980±0.0149	0.0709±0.0056**	0.2426±0.0384	0.1224±0.0052**	0.1701±0.0330	0.2093±0.0108	0.2162±0.0321	0.2576±0.0267
GaHMGR3	0.0433±0.0036	0.0828±0.0096	0.1333±0.0015**	0.0651±0.0033	0.0512±0.0046*	0.0179±0.0005	0.0339±0.0041**	0.0128±0.0014	0.0278±0.0002**	0.0017±0.0002	0.0018±0.0001	0.0022±0.0002*	0.0034±0.0007	0.0035±0.0003	0.0031±0.0001	0.0015±0.0001**	0.0019±0.0002	0.0020±0.0003
GaHMGR4	0.0530±0.0030	0.2340±0.0085	0.2926±0.0114**	0.1758±0.0154	0.1133±0.0054**	0.0649±0.0015	0.1007±0.0150*	0.0869±0.0116	0.1004±0.0068	0.0033±0.0003	0.0022±0.0001	0.0014±0.0001**	0.0038±0.0004	0.0019±0.0001**	0.0059±0.0006	0.0058±0.0006	0.0038±0.0003	0.0035±0.0003
GaHMGR5	0.0111±0.0007	0.0105±0.0007	0.0306±0.0018**	0.0071±0.0004	0.0102±0.0010**	0.0071±0.0004	0.0115±0.0004**	0.0047±0.0006	0.0094±0.0014**	0.0440±0.0010	0.0280±0.0012	0.0444±0.0053**	0.0296±0.0014	0.0323±0.0030	0.0226±0.0005	0.0488±0.0032**	0.0145±0.0009	0.0132±0.0019
GaHMGR6	0.0667±0.0022	0.0108±0.0003	0.0499±0.0058**	0.0359±0.0035	0.0316±0.0005	0.0278±0.0029	0.0246±0.0019	0.0371±0.0038	0.0427±0.0021	0.0769±0.0111	0.1160±0.0020	0.0766±0.0053**	0.1417±0.0113	0.1246±0.0042	0.1014±0.0066	0.1039±0.0062	0.1189±0.0091	0.0775±0.0115**
GaHMGR7	0.0180±0.0014	0.0230±0.0014	0.0628±0.0042**	0.0270±0.0011	0.0255±0.0022	0.0140±0.0008	0.0208±0.0005**	0.0134±0.0017	0.0177±0.0018*	0.0167±0.0015	0.0780±0.0082	0.0546±0.0073*	0.0108±0.0005	0.0249±0.0014**	0.0158±0.0023	0.0333±0.0010**	0.0315±0.0031	0.0386±0.0021*
GaHMGR8	0.0014±0.0001	0.0024±0.0003	0.0053±0.0004**	0.0029±0.0001	0.0024±0.0000**	0.0012±0.0001	0.0016±0.0001**	0.0018±0.0002	0.0013±0.0001**	0.0341±0.0028	0.0095±0.0011	0.0085±0.0013	0.0056±0.0005	0.0046±0.0004*	0.0043±0.0001	0.0097±0.0010**	0.0040±0.0006	0.0045±0.0007
GaHMGR9	0.1100±0.0066	0.1035±0.0113	0.1986±0.0195**	0.2328±0.0216	0.1340±0.0079**	0.1313±0.0118	0.1123±0.0107	0.1167±0.0090	0.1088±0.0061	0.0329±0.0030	0.0196±0.0013	0.0112±0.0023**	0.0141±0.0009	0.0090±0.0007**	0.0129±0.0017	0.0288±0.0025**	0.0248±0.0022	0.0184±0.0031*
GaMK1	0.0609±0.0043	0.0819±0.0017	0.1083±0.0057**	0.0717±0.0080	0.0564±0.0041*	0.0425±0.0012	0.0523±0.0066	0.0546±0.0036	0.0353±0.0021**	0.0308±0.0017	0.0207±0.0023	0.0180±0.0022	0.0230±0.0003	0.0210±0.0011*	0.0517±0.0046	0.0433±0.0058	0.0346±0.0046	0.0350±0.0036
GaPMK	0.1144±0.0078	0.1065±0.0148	0.1295±0.0135	0.1089±0.0027	0.0974±0.0063*	0.0688±0.0074	0.0852±0.0064*	0.0906±0.0040	0.0681±0.0075*	0.0344±0.0036	0.0431±0.0045	0.0281±0.0017**	0.0275±0.0026	0.0191±0.0008**	0.0293±0.0020	0.0539±0.0085**	0.0309±0.0019	0.0370±0.0027*
GaMVD	0.0582±0.0035	0.1218±0.0119	0.2047±0.0161**	0.1238±0.0102	0.0745±0.0062**	0.0573±0.0024	0.0576±0.0145	0.0443±0.0033	0.0402±0.0032	0.0158±0.0011	0.0141±0.0009	0.0199±0.0018**	0.0086±0.0002	0.0102±0.0003**	0.0139±0.0016	0.0261±0.0020**	0.0162±0.0025	0.0171±0.0012
Relative expression levels were calculated by the 2−ΔCt method with cotton UBQ7 as an internal control. Results are the mean ± SD of three replicates. Asterisks indicate significant differences between the treated and mock samples, *P ≤ 0.05, **P ≤ 0.01, Student’s t-test.
